# Supplementary material for: Chlorine borrowing: an efficient method for an easier use of alcohols as alkylation agents
Source: Royal Society of Chemistry journal article supplement (doi:10.1039/b807230b), 2008-11-14
Supplement: b807230b.pdf [file b807230b.pdf]

## Supplementary Information for

# Chlorine borrowing: an efficient method for an easier use of alcohols as alkylation agents.

By Philippe Makowski,<sup>a</sup> Regina Rothe,<sup>a</sup> Arne Thomas,<sup>a</sup> Markus Niederberger<sup>b</sup> and Frédéric Goettmann,<sup>a,c\*</sup>

### Synthesis of SnO<sub>2</sub>NPs

Procedure with tin(IV) chloride;<sup>1</sup> 1.5 ml of tin (IV)chloride (Aldrich; 99%) were slowly added to 30 ml anhydrous benzyl alcohol (Aldrich; 99,8%). The reaction mixture was heated to 110°C for 24 hours in a closed reactor under stirring. The benzyl alcohol was transused. The white precipitate was dispersed in acetone, washed with ether and dried at 60°C.

Procedure with tin(IV) tert-butoxide;<sup>2</sup> In a typical synthesis, tin(IV) tert-butoxide (500mg, 1,216 mmol) was added to 20 ml benzyl alcohol. The reaction mixture was transferred into a Teflon cup of 45 ml inner volume, placed in a steel autoclave and carefully sealed. The autoclave was heated in a furnace at 220°C for 2 days. The resulting turbid suspension was centrifuged, the precipitate washed with ethanol and subsequently dried at 60°C.

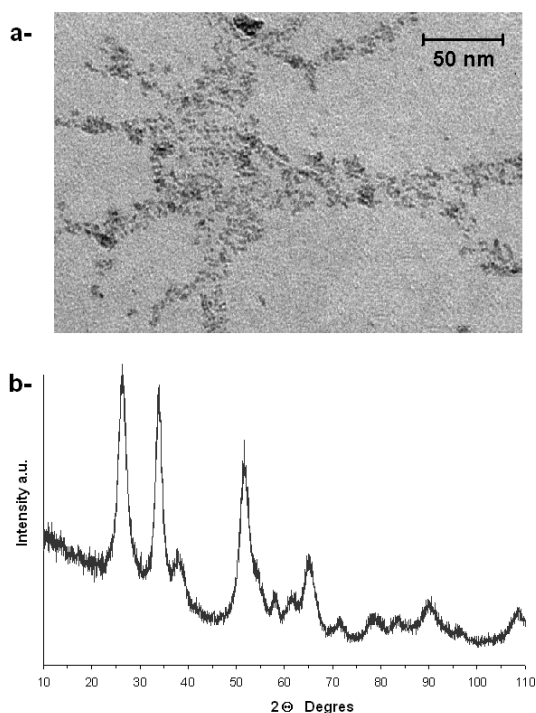

Fig. 1 a- Transmission electron micrographs of the used chlorine bearing SnO<sub>2</sub>NPs. b- X-ray diffraction pattern of the same particles .

### Evidences for the formation of benzyl chloride

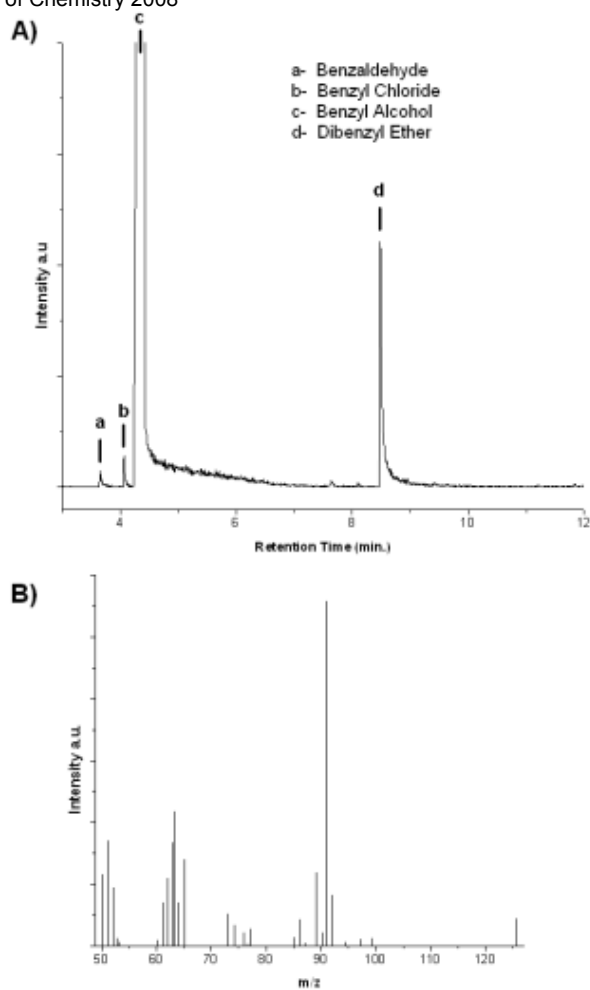

**Fig. 2** Products detected in the reaction of benzyl alcohol (300mg) in presence of SnO<sub>2</sub>NPs (25mg) after 20h at 100°C. a- Chromatogram. b- Mass spectrum corresponding to product b.

<sup>1</sup> J. H. Ba, J. Polleux, M. Antonietti, and M. Niederberger, *Advanced Materials*, 2005, **17**, 2509.

<sup>2</sup> N. Pinna, G. Neri, M. Antonietti, and M. Niederberger, *Angewandte Chemie-International Edition*, 2004, **43**, 4345.
